# Supplementary material for: Assessment of genetic diversity by phenological traits, field performance, and Start Codon Targeted (SCoT) polymorphism marker of seventeen soybean genotypes (Glycine max L.)
Source: PeerJ. 2024 Oct 9;12:e17868. doi: 10.7717/peerj.17868 (PMC11470765; doi:10.7717/peerj.17868)
Supplement: Supplemental Information 1 [file peerj-12-17868-s001.xlsx]

## Sheet: Phenological traits
Genotype	Replicate	RN	RL	RW	TA	SL	LF1	DFI	LA	LW	LL	s.W	s.L	s.A	w.s
1	1	12	17.465	0.333	53.213	18.803	7.222	0.243	15.31	3.5325	4.3355	9.091	7.644	55.886	0.388
1	2	13	20.872	0.355	41.206	23.074	8.611	0.184	13.545	3.54	4.2955	9.401	7.484	57.386	0.446
1	3	16	23.162	0.395	49.781	23.622	7.13	0.291	12.7975	3.3355	3.6595	9.381	7.504	56.186	0.433
2	1	11	7.348	0.229	95.465	9.626	5.317	0.186	8.405	2.694	3.193	7.71	6.839	40.553	0.335
2	2	10	6.468	0.318	32.905	8.504	4.609	0.162	7.144	2.8165	3.0835	8.1	6.669	46.053	0.392
2	3	12	6.908	0.2735	64.185	9.17	4.95	0.159	7.775	2.75525	3.13825	7.92	6.709	43.153	0.397
3	1	6	14.925	0.357	28.323	13.467	6.352	0.223	11.116	4.113	4.95	8.846	7.758	50.313	0.517
3	2	6	18.535	0.332	25.532	13.502	6.38	0.241	8.612	4.398	4.984	9.006	7.658	51.413	0.624
3	3	8	16.73	0.3445	26.9275	13.492	6.306	0.202	9.864	4.2555	4.967	8.986	7.408	52.213	0.517
4	1	8	13.423	0.278	34.676	13.207	5.334	0.25	10.742	3.484	3.6125	8.624	7.5	40.623	0.613
4	2	9	16.62	0.379	41.719	13.581	5.498	0.32	10.702	3.018	3.7235	9.004	7.8	47.623	0.658
4	3	9	15.0215	0.3285	38.1975	13.424	5.401	0.27	11.07	3.251	3.668	8.844	7.05	45.623	0.56
5	1	19	20.403	0.245	45.416	10.738	4.824	0.269	9.7435	2.619	3.8965	8.001	7.044	48.698	0.481
5	2	18	13.884	0.309	60.744	14.835	8.794	0.311	10.11	3.3755	3.9185	7.821	6.97	54.898	0.437
5	3	16	14.314	0.41	61.825	11.434	5.898	0.313	10.307	3.765	3.984	7.941	6.737	52.098	0.361
6	1	12	23.135	0.476	52.615	18.06	7.455	0.255	10.418	4.0675	4.2655	8.301	7.861	41.501	0.43
6	2	11	22.802	0.314	63.066	15.558	5.823	0.206	11.964	4.533	4.735	8.261	7.961	57.501	0.509
6	3	10	19.036	0.299	37.47	17.409	6.699	0.231	9.573	3.011	3.838	8.431	7.161	55.501	0.432
7	1	15	13.825	0.381	22.513	16.042	5.321	0.209	10.306	3.772	4.2865	8.5	7.344	48.016	0.483
7	2	13	19.713	0.249	50.08	18.308	5.905	0.204	9.8	3.27	3.6425	8.37	7.207	48.816	0.521
7	3	17	21.94	0.389	52.361	17.25	5.634	0.205	12.2755	3.703	3.792	8.33	7.37	48.416	0.521
8	1	21	11.65	0.37	62.975	12.493	6.726	0.238	10.417	3.9885	3.1675	8.807	7.625	54.064	0.601
8	2	24	16.707	0.327	57.982	11.453	5.202	0.31	7.124	3.231	3.375	8.717	7.395	50.064	0.456
8	3	18	18.698	0.328	51.695	10.967	4.197	0.288	7.101	2.98	3.4195	8.777	7.065	52.364	0.481
9	1	9	21.508	0.3	43.645	13.17	5.561	0.284	7.975	2.7555	3.785	9.009	7.464	54.503	0.449
9	2	15	19.175	0.4	45.023	13.066	5.841	0.246	8.1215	2.6115	3.987	8.849	7.494	51.663	0.375
9	3	14	14.968	0.146	36.973	13.262	5.701	0.31	8.04825	2.6835	3.886	8.989	7.404	57.583	0.29
10	1	25	21.659	0.341	22.992	12.289	8.724	0.288	6.591	3.086	3.345	8.86	7.712	47.545	0.536
10	2	20	9.544	0.316	69.722	13.206	6.34	0.316	6.292	2.12	2.167	9	7.642	53.045	0.543
10	3	18	13.391	0.421	55.67	9.964	5.5	0.38	6.4415	2.603	2.756	8.9	7.602	51.045	0.587
11	1	16	14.942	0.351	39.879	9.292	4.382	0.198	8.3345	2.844	4.059	8.708	7.305	55.014	0.47
11	2	12	18.756	0.317	47.907	16.765	5.537	0.335	12.757	3.523	5.0875	8.808	7.405	59.004	0.523
11	3	14	17.524	0.279	58.293	10.655	5.559	0.2	7.14	2.6195	3.586	8.788	7.055	51.914	0.426
12	1	17	12.102	0.397	64.7	13.91	5.654	0.185	8.704	3.024	3.3765	7.219	8.808	53.81	0.645
12	2	16	12.006	0.387	62.8	14.99	5.694	0.16	8.801	4.511	4.418	7.109	9.208	51.922	0.573
12	3	17	12	0.407	60.909	15.89	5.464	0.18	8.7525	3.7675	3.89725	7.29	9.008	52.716	0.559
13	1	22	16.996	0.279	35.226	15.195	6.756	0.288	6.573	2.537	2.964	8.207	6.889	45.09	0.283
13	2	21	19.579	0.249	48.366	15.749	5.063	0.225	9.916	3.111	4.0015	8.127	7.089	44.29	0.338
13	3	23	12.667	0.256	48.4	17.666	4.115	0.25	7.99	3.1005	3.8795	8.067	6.889	46.19	0.333
14	1	28	19.316	0.372	37.244	17.133	7.405	0.233	12.163	3.5875	4.6545	8.314	7.885	44.645	0.499
14	2	25	18.948	0.41	44.502	16.448	5.586	0.289	7.696	3.023	3.296	8.224	6.085	45.345	0.464
14	3	27	18.338	0.402	48.008	15.731	6.429	0.24	13.747	3.9565	4.4845	8.104	6.985	43.945	0.48
15	1	13	16.014	0.419	40.772	19.649	6.16	0.221	8.777	3.1565	3.6575	9.044	6.078	49.603	0.468
15	2	13	18.214	0.312	41.013	21.051	5.608	0.2	15.537	4.267	5.068	9.104	6.998	50.203	0.455
15	3	12	19.207	0.475	64.228	18.521	6.187	0.267	14.08	3.435	4.8605	8.924	7.058	49.003	0.501
16	1	10	14.793	0.284	34.145	14.971	5.478	0.237	7.639	3.07	3.3715	8.285	6.019	43.508	0.19
16	2	8	14.844	0.186	69.228	19.789	7.062	0.266	8.4245	3.4225	3.341	8.165	8.419	45.088	0.378
16	3	6	18.874	0.292	50.451	16.82	6.068	0.25	10.7715	2.936	4.2785	8.105	6.719	44.268	0.258
17	1	24	12.923	0.408	42.808	15.542	5.459	0.241	7.5305	2.628	3.796	8.462	7.065	48.73	0.437
17	2	26	15.181	0.258	33.253	13.64	6.66	0.382	9.4255	3.057	3.6155	8.902	7.105	46.83	0.646
17	3	22	26.754	0.345	35.263	22.227	6.077	0.272	12.453	3.8455	4.006	8.082	7.325	47.63	0.505
				Dendrogram with heat map

## Sheet: Field performance
Season	Reps	Genotype	Plant height	Branches No.	Pods No./ plant	Seeds No./ plnt	Seeds weight/ plant	100-Seed weight		Reps	Genotype	Plant height		Plant height	Branches No.		Branches No.	Pods No./ plant			Seeds No./ plnt			Seeds weight/ plant			100-Seed weight
1	1	1	43	3	79	189	26.4	13.9		1	1	43	37	40	3	4	3.5	79	75	77	189	180	184.5	26.4	27	26.7	13.9	15	14.45
1	1	2	75	5	42	105	23.1	22		1	2	75	69	72	5	4	4.5	42	53	47.5	105	153	129	23.1	21.4	22.25	22	13.9	17.95
1	1	3	70	3	38	68	10.8	15.8		1	3	70	80	75	3	3	3	38	33	35.5	68	96	82	10.8	17.2	14	15.8	17.9	16.85
1	1	4	85	3	50	150	22.5	15		1	4	85	85	85	3	3	3	50	44	47	150	105	127.5	22.5	21	21.75	15	20	17.5
1	1	5	35	4	65	200	32.2	16.1		1	5	35	37	36	4	2	3	65	83	74	200	237	218.5	32.2	40.9	36.55	16.1	17.2	16.65
1	1	6	35	3	70	201	34	16.9		1	6	35	39	37	3	3	3	70	63	66.5	201	163	182	34	27.7	30.85	16.9	16.9	16.9
1	1	7	100	3	35	100	14.7	14.7		1	7	100	90	95	3	4	3.5	35	40	37.5	100	104	102	14.7	18.2	16.45	14.7	17.9	16.3
1	1	8	61	3	33	98	19.6	20		1	8	61	57	59	3	5	4	33	33	33	98	95	96.5	19.6	15.2	17.4	20	16	18
1	1	9	40	4	50	148	31.7	21.4		1	9	40	45	42.5	4	4	4	50	47	48.5	148	131	139.5	31.7	23.5	27.6	21.4	12.9	17.15
1	1	10	43	3	56	151	26.1	17.2		1	10	43	44	43.5	3	4	3.5	56	62	59	151	179	165	26.1	25	25.55	17.2	13.9	15.55
1	1	11	30	4	69	190	26.6	14		1	11	30	35	32.5	4	3	3.5	69	70	69.5	190	196	193	26.6	29.4	28	14	15	14.5
1	1	12	46	3	48	120	19.2	16		1	12	46	45	45.5	3	3	3	48	46	47	120	119	119.5	19.2	21.4	20.3	16	17.9	16.95
1	1	13	47	5	62	170	30.6	16		1	13	47	46	46.5	5	3	4	62	55	58.5	170	148	159	30.6	20.7	25.65	16	13.9	14.95
1	1	14	50	3	75	201	30.1	14.9		1	14	50	50	50	3	4	3.5	75	70	72.5	201	196	198.5	30.1	27.4	28.75	14.9	13.9	14.4
1	1	15	53	3	40	110	16.5	15		1	15	53	50	51.5	3	5	4	40	44	42	110	114	112	16.5	15.9	16.2	15	13.9	14.45
1	1	16	77	4	50	119	22.6	18.9		1	16	77	70	73.5	4	4	4	50	52	51	119	145	132	22.6	24.6	23.6	18.9	16.9	17.9
1	1	17	60	4	66	181	36.2	20		1	17	60	60	60	4	3	3.5	66	60	63	181	144	162.5	36.2	21.6	28.9	20	15	17.5
1	2	1	40	3	74	185	27.7	14.9		2	1	40	39	39.5	3	4	3.5	74	72	73	185	180	182.5	27.7	34.2	30.95	14.9	19	16.95
1	2	2	64	4	49	122	21.9	17.9		2	2	64	62	63	4	5	4.5	49	58	53.5	122	156	139	21.9	28	24.95	17.9	17.9	17.9
1	2	3	78	4	35	61	11.3	18.5		2	3	78	81	79.5	4	5	4.5	35	38	36.5	61	98	79.5	11.3	18.6	14.95	18.5	18.9	18.7
1	2	4	80	3	50	145	29	20		2	4	80	80	80	3	3	3	50	46	48	145	128	136.5	29	25.6	27.3	20	20	20
1	2	5	40	4	65	195	35.4	19.1		2	5	40	39	39.5	4	3	3.5	65	74	69.5	195	214	204.5	35.4	28.5	31.95	19.1	13.3	16.2
1	2	6	37	2	64	198	44	22.2		2	6	37	35	36	2	2	2	64	60	62	198	168	183	44	31.9	37.95	22.2	18.9	20.55
1	2	7	90	3	40	110	14.1	14.6		2	7	90	95	92.5	3	4	3.5	40	39	39.5	110	113	111.5	14.1	19.2	16.65	14.6	16.9	15.75
1	2	8	60	4	37	101	15.3	15.1		2	8	60	58	59	4	5	4.5	37	35	36	101	98	99.5	15.3	15.6	15.45	15.1	15.9	15.5
1	2	9	40	4	50	145	26.4	18.2		2	9	40	46	43	4	4	4	50	50	50	145	130	137.5	26.4	22.1	24.25	18.2	17	17.6
1	2	10	48	3	51	140	22.4	16		2	10	48	42	45	3	3	3	51	57	54	140	159	149.5	22.4	25.4	23.9	16	15.9	15.95
1	2	11	32	3	66	180	36	20		2	11	32	37	34.5	3	4	3.5	66	70	68	180	182	181	36	29.1	32.55	20	15.9	17.95
1	2	12	41	3	50	133	19.9	14.9		2	12	41	45	43	3	3	3	50	48	49	133	134	133.5	19.9	22.7	21.3	14.9	16.9	15.9
1	2	13	45	4	62	156	27.9	17.8		2	13	45	50	47.5	4	4	4	62	58	60	156	150	153	27.9	27	27.45	17.8	13.5	15.65
1	2	14	51	4	76	199	25.8	12.9		2	14	51	45	48	4	3	3.5	76	77	76.5	199	200	199.5	25.8	30	27.9	12.9	15	13.95
1	2	15	52	3	46	141	25.3	17.9		2	15	52	50	51	3	5	4	46	40	43	141	108	124.5	25.3	20.5	22.9	17.9	18.9	18.4
1	2	16	75	3	55	130	19	14.6		2	16	75	73	74	3	4	3.5	55	50	52.5	130	135	132.5	19	24.3	21.65	14.6	18	16.3
1	2	17	55	3	69	179	32.2	17.9		2	17	55	59	57	3	4	3.5	69	66	67.5	179	184	181.5	32.2	25.7	28.95	17.9	13.9	15.9
1	3	1	41	4	73	127	20.3	15.9		3	1	41	40	40.5	4	5	4.5	73	77	75	127	231	179	20.3	32.4	26.35	15.9	14	14.95
1	3	2	60	4	50	87	17.4	20		3	2	60	65	62.5	4	5	4.5	50	49	49.5	87	132	109.5	17.4	12.8	15.1	20	12.9	16.45
1	3	3	70	3	33	82	11.4	13.9		3	3	70	84	77	3	4	3.5	33	36	34.5	82	100	91	11.4	18	14.7	13.9	18	15.95
1	3	4	80	4	45	136	20.4	15		3	4	80	82	81	4	4	4	45	49	47	136	142	139	20.4	24.1	22.25	15	16.9	15.95
1	3	5	35	3	63	190	41.7	21.9		3	5	35	35	35	3	2	2.5	63	75	69	190	225	207.5	41.7	42.7	42.2	21.9	18.8	20.35
1	3	6	39	2	70	199	22	11		3	6	39	36	37.5	2	2	2	70	66	68	199	191	195	22	28.6	25.3	11	14.9	12.95
1	3	7	90	4	35	115	14.4	12.5		3	7	90	100	95	4	4	4	35	37	36	115	99	107	14.4	16.8	15.6	12.5	16.9	14.7
1	3	8	55	3	35	96	17	16.8		3	8	55	53	54	3	3	3	35	36	35.5	96	97	96.5	17	14.7	15.85	16.8	15.1	15.95
1	3	9	40	3	47	129	19.3	14.9		3	9	40	49	44.5	3	3	3	47	49	48	129	137	133	19.3	26	22.65	14.9	18.9	16.9
1	3	10	45	4	60	160	29.4	18.3		3	10	45	47	46	4	3	3.5	60	59	59.5	160	165	162.5	29.4	28	28.7	18.3	16.9	17.6
1	3	11	35	3	70	185	37.8	20.4		3	11	35	32	33.5	3	4	3.5	70	68	69	185	183	184	37.8	23.7	30.75	20.4	12.9	16.65
1	3	12	40	4	50	139	25	17.9		3	12	40	43	41.5	4	4	4	50	46	48	139	110	124.5	25	16.5	20.75	17.9	15	16.45
1	3	13	45	5	56	155	21.7	14		3	13	45	49	47	5	4	4.5	56	61	58.5	155	164	159.5	21.7	29.5	25.6	14	17.9	15.95
1	3	14	47	5	73	210	33.6	16		3	14	47	48	47.5	5	3	4	73	79	76	210	213	211.5	33.6	18.3	25.95	16	17.9	16.95
1	3	15	53	4	50	146	18.9	12.9		3	15	53	52	52.5	4	5	4.5	50	46	48	146	128	137	18.9	21.7	20.3	12.9	16.6	14.75
1	3	16	70	4	60	160	33.6	20.2		3	16	70	70	70	4	3	3.5	60	55	57.5	160	141	150.5	33.6	18.3	25.95	20.2	12.9	16.55
1	3	17	58	5	60	155	26.3	16.9		3	17	58	60	59	5	4	4.5	60	65	62.5	155	188	171.5	26.3	30	28.15	16.9	15.9	16.4
1	4	1	38	3	74	129	18	13.9		4	1	38	39	38.5	3	5	4	74	76	75	129	182	155.5	18	32.7	25.35	13.9	17.9	15.9
1	4	2	67	4	52	91	16.3	17.9		4	2	67	66	66.5	4	5	4.5	52	50	51	91	130	110.5	16.3	22.1	19.2	17.9	17	17.45
1	4	3	75	4	35	105	22	18.5		4	3	75	79	77	4	4	4	35	37	36	105	99	102	22	16.8	19.4	18.5	18.1	18.3
1	4	4	75	4	48	145	20.3	14		4	4	75	80	77.5	4	3	3.5	48	50	49	145	135	140	20.3	22.9	21.6	14	16.9	15.45
1	4	5	30	3	67	196	37	18.8		4	5	30	36	33	3	4	3.5	67	73	70	196	175	185.5	37	25	31	18.8	16.2	17.5
1	4	6	35	3	63	190	24	12.6		4	6	35	35	35	3	2	2.5	63	70	66.5	190	196	193	24	39.2	31.6	12.6	20	16.3
1	4	7	100	3	37	120	14.8	12.3		4	7	100	95	97.5	3	3	3	37	40	38.5	120	104	112	14.8	17.6	16.2	12.3	16.9	14.6
1	4	8	50	3	37	99	16.4	16.5		4	8	50	55	52.5	3	4	3.5	37	39	38	99	113	106	16.4	19.2	17.8	16.5	16.8	16.65
1	4	9	45	4	50	148	20.3	13.7		4	9	45	47	46	4	3	3.5	50	46	48	148	133	140.5	20.3	23.9	22.1	13.7	17.9	15.8
1	4	10	40	3	55	145	28	19.3		4	10	40	40	40	3	3	3	55	66	60.5	145	184	164.5	28	31.2	29.6	19.3	16.9	18.1
1	4	11	35	4	65	181	23.7	13		4	11	35	37	36	4	4	4	65	70	67.5	181	189	185	23.7	28.3	26	13	14.9	13.95
1	4	12	45	2	48	141	23.9	16.9		4	12	45	46	45.5	2	3	2.5	48	50	49	141	130	135.5	23.9	23.4	23.65	16.9	18	17.45
1	4	13	46	3	60	171	25.6	14.9		4	13	46	49	47.5	3	3	3	60	60	60	171	156	163.5	25.6	23.4	24.5	14.9	15	14.95
1	4	14	47	3	73	200	34	17		4	14	47	49	48	3	3	3	73	72	72.5	200	201	200.5	34	36.1	35.05	17	17.9	17.45
1	4	15	56	4	46	140	25	20		4	15	56	52	54	4	4	4	46	40	43	140	108	124	25	18.3	21.65	20	16.9	18.45
1	4	16	75	5	57	151	31.7	20.9		4	16	75	72	73.5	5	3	4	57	56	56.5	151	151	151	31.7	22.4	27.05	20.9	14.9	17.9
1	4	17	60	4	65	170	27.2	16		4	17	60	55	57.5	4	3	3.5	65	61	63	170	164	167	27.2	26.2	26.7	16	15.9	15.95
2	1	1	37	4	75	180	27	15
2	1	2	69	4	53	153	21.4	13.9
2	1	3	80	3	33	96	17.2	17.9
2	1	4	85	3	44	105	21	20
2	1	5	37	2	83	237	40.9	17.2
2	1	6	39	3	63	163	27.7	16.9
2	1	7	90	4	40	104	18.2	17.9
2	1	8	57	5	33	95	15.2	16
2	1	9	45	4	47	131	23.5	12.9
2	1	10	44	4	62	179	25	13.9
2	1	11	35	3	70	196	29.4	15
2	1	12	45	3	46	119	21.4	17.9
2	1	13	46	3	55	148	20.7	13.9
2	1	14	50	4	70	196	27.4	13.9
2	1	15	50	5	44	114	15.9	13.9
2	1	16	70	4	52	145	24.6	16.9
2	1	17	60	3	60	144	21.6	15
2	2	1	39	4	72	180	34.2	19
2	2	2	62	5	58	156	28	17.9
2	2	3	81	5	38	98	18.6	18.9
2	2	4	80	3	46	128	25.6	20
2	2	5	39	3	74	214	28.5	13.3
2	2	6	35	2	60	168	31.9	18.9
2	2	7	95	4	39	113	19.2	16.9
2	2	8	58	5	35	98	15.6	15.9
2	2	9	46	4	50	130	22.1	17
2	2	10	42	3	57	159	25.4	15.9
2	2	11	37	4	70	182	29.1	15.9
2	2	12	45	3	48	134	22.7	16.9
2	2	13	50	4	58	150	27	13.5
2	2	14	45	3	77	200	30	15
2	2	15	50	5	40	108	20.5	18.9
2	2	16	73	4	50	135	24.3	18
2	2	17	59	4	66	184	25.7	13.9
2	3	1	40	5	77	231	32.4	14
2	3	2	65	5	49	132	12.8	12.9
2	3	3	84	4	36	100	18	18
2	3	4	82	4	49	142	24.1	16.9
2	3	5	35	2	75	225	42.7	18.8
2	3	6	36	2	66	191	28.6	14.9
2	3	7	100	4	37	99	16.8	16.9
2	3	8	53	3	36	97	14.7	15.1
2	3	9	49	3	49	137	26	18.9
2	3	10	47	3	59	165	28	16.9
2	3	11	32	4	68	183	23.7	12.9
2	3	12	43	4	46	110	16.5	15
2	3	13	49	4	61	164	29.5	17.9
2	3	14	48	3	79	213	18.3	17.9
2	3	15	52	5	46	128	21.7	16.6
2	3	16	70	3	55	141	18.3	12.9
2	3	17	60	4	65	188	30	15.9
2	4	1	39	5	76	182	32.7	17.9
2	4	2	66	5	50	130	22.1	17
2	4	3	79	4	37	99	16.8	18.1
2	4	4	80	3	50	135	22.9	16.9
2	4	5	36	4	73	175	25	16.2
2	4	6	35	2	70	196	39.2	20
2	4	7	95	3	40	104	17.6	16.9
2	4	8	55	4	39	113	19.2	16.8
2	4	9	47	3	46	133	23.9	17.9
2	4	10	40	3	66	184	31.2	16.9
2	4	11	37	4	70	189	28.3	14.9
2	4	12	46	3	50	130	23.4	18
2	4	13	49	3	60	156	23.4	15
2	4	14	49	3	72	201	36.1	17.9
2	4	15	52	4	40	108	18.3	16.9
2	4	16	72	3	56	151	22.4	14.9
2	4	17	55	3	61	164	26.2	15.9
											Cluster 1 Similarity = 67.28								Cluster 2 Similarity = 67.28		40.67						Cluster 3 Similarity = 67.28		48.37				Cluster 4 Similarity = 67.28	66.63
			Plant height	Branches No.	Pods No./ plant	Seeds No./ plnt	Seeds weight/ plant	100-Seed weight			1	11	14	13	17	Mean		2	3	8	15	7	Mean		4	16	9	12	10	Mean		5	6	Mean
	NC 105	1	39.625	3.875	75	175.375	27.3375	15.5625	Plant height		39.625	34.125	48.375	47.125	58.375	45.525		66	77.125	56.125	52.25	95	69.3		80.875	72.75	44	43.875	43.625	57.025		35.875	36.375	36.125
	H 117	2	66	4.5	50.375	122	20.375	17.4375								0							0							0				0
	H 113	3	77.125	3.75	35.625	88.625	15.7625	17.45	Branches No.		3.875	3.625	3.5	3.875	3.75	3.725		4.5	3.75	3.75	4.125	3.5	3.925		3.375	3.75	3.625	3.125	3.25	3.425		3.125	2.375	2.75
	H 129	4	80.875	3.375	47.75	135.75	23.225	17.225								0							0							0				0
	NC 104	5	35.875	3.125	70.625	204	35.425	17.675	Pods No./ plant		75	68.5	74.375	59.25	64	68.225		50.375	35.625	35.625	44	37.875	40.7		47.75	54.375	48.625	48.25	58.25	51.45		70.625	65.75	68.1875
	H 30	6	36.375	2.375	65.75	188.25	31.425	16.675								0							0							0				0
	H 32	7	95	3.5	37.875	108.125	16.225	15.3375	Seeds No./ plnt		175.375	185.75	202.5	158.75	170.625	178.6		122	88.625	99.625	124.375	108.125	108.55		135.75	141.5	137.625	128.25	160.375	140.7		204	188.25	196.125
	H 2 L 12	8	56.125	3.75	35.625	99.625	16.625	16.525								0							0							0				0
	H 15 L 5	9	44	3.625	48.625	137.625	24.15	16.8625	Seeds weight/ plant		27.3375	29.325	29.4125	25.8	28.175	28.01		20.375	15.7625	16.625	20.2625	16.225	17.85		23.225	24.5625	24.15	21.5	26.9375	24.075		35.425	31.425	33.425
	Toano	10	43.625	3.25	58.25	160.375	26.9375	16.8								0							0							0				0
	Holladay	11	34.125	3.625	68.5	185.75	29.325	15.7625	100-Seed weight		15.5625	15.7625	15.6875	15.375	16.4375	15.765		17.4375	17.45	16.525	16.5125	15.3375	16.6525		17.225	17.1625	16.8625	16.6875	16.8	16.9475		17.675	16.675	17.175
	DR 101	12	43.875	3.125	48.25	128.25	21.5	16.6875																						Plant height	Branches No.	Pods No./ plant	Seeds No./ plnt	Seeds weight/ plant	100-Seed weight
	Giza 35	13	47.125	3.875	59.25	158.75	25.8	15.375																				NC105	1	39.625	3.875	75	175.375	27.3375	15.5625
	Giza 111	14	48.375	3.5	74.375	202.5	29.4125	15.6875																				H117	2	66	4.5	50.375	122	20.375	17.4375
	Crawford	15	52.25	4.125	44	124.375	20.2625	16.5125																				H113	3	77.125	3.75	35.625	88.625	15.7625	17.45
	D 75-12035	16	72.75	3.75	54.375	141.5	24.5625	17.1625																				H129	4	80.875	3.375	47.75	135.75	23.225	17.225
	Hutieson	17	58.375	3.75	64	170.625	28.175	16.4375																				NC104	5	35.875	3.125	70.625	204	35.425	17.675
																												H30	6	36.375	2.375	65.75	188.25	31.425	16.675
																												H32	7	95	3.5	37.875	108.125	16.225	15.3375
								1	2	3	4																	H2L12	8	56.125	3.75	35.625	99.625	16.625	16.525
							Plant height	45.525	69.3	57.025	36.125																	H15L5	9	44	3.625	48.625	137.625	24.15	16.8625
							Branches No.	3.725	3.925	3.425	2.75																	Holladay	11	34.125	3.625	68.5	185.75	29.325	15.7625
							Pods No./ plant	68.225	40.7	51.45	68.1875																	Giza35	13	47.125	3.875	59.25	158.75	25.8	15.375
							Seeds No./ plnt	178.6	108.55	140.7	196.125																	Crawford	15	52.25	4.125	44	124.375	20.2625	16.5125
							Seeds weight/ plant	28.01	17.85	24.075	33.425																	Hutieson	17	58.375	3.75	64	170.625	28.175	16.4375
							100-Seed weight	15.765	16.6525	16.9475	17.175
																														Plant height	Branches No.	Pods No./ plant	Seeds No./ plnt	Seeds weight/ plant	100-Seed weight
																												NC105	1	39.625	3.875	75	175.375	27.3375	15.5625
																												Holladay	11	34.125	3.625	68.5	185.75	29.325	15.7625
																												Giza111	14	48.375	3.5	74.375	202.5	29.4125	15.6875
																												Giza35	13	47.125	3.875	59.25	158.75	25.8	15.375
																												Hutieson	17	58.375	3.75	64	170.625	28.175	16.4375
																												Cluster 1		45.525	3.725	68.225	178.6	28.01	15.765
																												H117	2	66	4.5	50.375	122	20.375	17.4375
																												H113	3	77.125	3.75	35.625	88.625	15.7625	17.45
																												H2L12	8	56.125	3.75	35.625	99.625	16.625	16.525
																												Crawford	15	52.25	4.125	44	124.375	20.2625	16.5125
																												Cluster 2		62.875	4.03125	41.4062	108.656	18.2563	16.9813
																												H129	4	80.875	3.375	47.75	135.75	23.225	17.225
																												D75-12035	16	72.75	3.75	54.375	141.5	24.5625	17.1625
																												Cluster 3
																												NC104	5	35.875	3.125	70.625	204	35.425	17.675
																												H30	6	36.375	2.375	65.75	188.25	31.425	16.675
																												Cluster 4		36.125	2.75	68.1875	196.125	33.425	17.175
																												H32	7	95	3.5	37.875	108.125	16.225	15.3375
																												Cluster 5
																												H15L5	9	44	3.625	48.625	137.625	24.15	16.8625
																												DR101	12	43.875	3.125	48.25	128.25	21.5	16.6875
																												Toano	10	43.625	3.25	58.25	160.375	26.9375	16.8
																												Cluster 6

## Sheet: Figure 3
Figure 3: Amplifications of the seventeen Soybean genotypes using eight SCoT primers
a SCoT 2	b SCoT 3	c SCoT 4	d SCoT 6	e SCoT 9	f SCoT 10
g SCoT 11	h SCoT 13

## Sheet: SCoT polymorphism marker
		Raw data for fig. 4.SCoT
	Band 1	Band 2	Band 3	Band 4	Band 5	Band 6	Band 7	Band 8	Band 9	Band 10	Band 11	Band 12	Band 13	Band 14	Band 15	Band 16	Band 17	Band 18	Band 19	Band 20	Band 21
NC105	1	1	0	0	1	1	1	1	1	1	1	1	0	1	1	1	0	1	0	1	0
H117	1	1	0	0	1	1	0	1	1	1	1	1	1	1	1	1	1	1	0	1	0
H113	1	1	0	0	1	1	1	1	1	1	1	1	1	1	1	1	1	1	0	1	0
H129	0	1	0	1	1	1	1	1	1	1	0	1	0	1	1	1	0	1	1	1	0
NC104	0	1	0	0	0	1	1	1	1	1	0	1	0	1	1	1	0	1	1	1	0
H30	0	1	0	0	0	1	0	1	1	1	0	1	0	1	0	1	0	1	1	1	0
H32	0	1	0	0	1	1	1	1	1	1	0	1	1	1	1	0	0	1	1	1	0
H2L12	0	1	1	0	1	1	1	1	1	1	0	1	1	1	1	0	0	1	1	1	0
H15L5	0	1	0	0	1	1	1	1	1	1	1	1	0	1	1	0	0	1	1	1	0
Toano	1	1	0	0	1	1	1	1	1	1	1	1	1	1	1	1	1	1	1	1	0
Holladay	1	1	0	0	1	1	1	1	1	1	0	1	1	1	1	1	1	1	1	1	0
DR101	0	1	1	0	1	1	0	1	1	1	0	1	0	1	1	1	0	1	1	1	0
Giza35	0	1	0	0	1	1	1	1	0	1	0	1	1	1	1	1	1	1	1	1	0
Giza111	0	1	0	0	0	1	1	1	0	1	0	1	0	1	1	1	0	1	1	1	0
Crawford	0	1	0	0	1	1	0	1	1	1	0	1	0	1	1	0	0	1	1	1	0
D75_12035	0	1	0	0	0	1	1	1	1	1	0	1	0	1	1	0	0	1	1	1	0
Hutcheson	0	1	0	0	0	1	1	1	1	0	0	1	1	1	1	0	0	1	1	1	0
		Figure 4: Hierarchical clustering by heatmap of seventeen soybean genotypes with the bands (gene) regions for SCoTanalysis using Euclidean distance.

## Sheet: complete assessement
		Collective raw data for fig. 5.biplot
		NC105	H117	H113	H129	NC104	H30	H32	H2L12	H15L5	Toano	Holladay	DR101	Giza35	Giza111	Crawford	D75_12035	Hutcheson
	Plant height	39.63	66	77.13	80.88	35.88	36.38	95	56.13	44	43.63	34.13	43.88	47.13	48.38	52.25	72.75	58.38
	No. of branches per plant	3.88	4.5	3.75	3.38	3.13	2.38	3.5	3.75	3.63	3.25	3.63	3.13	3.88	3.5	4.13	3.75	3.75
	No. of Pods per plant	75	50.38	35.63	47.75	70.63	65.75	37.88	35.63	48.63	58.25	68.5	48.25	59.25	74.38	44	54.38	64
	No. of Seeds per plant	175.4	122	88.63	135.8	204	188.3	108.1	99.63	137.6	160.4	185.8	128.3	158.8	202.5	124.4	141.5	170.6
	Seeds weight per plant	27.34	20.38	15.76	23.23	35.42	31.42	16.23	16.63	24.15	26.94	29.33	21.5	25.8	29.41	20.26	24.56	28.18
	100-Seed weight	15.56	17.44	17.45	17.23	17.67	16.67	15.34	16.52	16.86	16.8	15.76	16.69	15.38	15.69	16.51	17.16	16.44
	RN	13.67	11	6.67	8.67	17.67	11	15	21	12.67	21	14	16.67	22	26.67	12.67	8	24
	RL	20.5	6.91	16.73	15.02	16.2	21.66	18.49	15.69	18.55	14.86	17.07	12.04	16.41	18.87	17.81	16.17	18.29
	RW	0.36	0.27	0.34	0.33	0.32	0.36	0.34	0.34	0.28	0.36	0.32	0.4	0.26	0.39	0.4	0.25	0.34
	TA	48.07	64.19	26.93	38.2	56	51.05	41.65	57.55	41.88	49.46	48.69	62.8	44	43.25	48.67	51.27	37.11
	SL	21.83	9.1	13.49	13.4	12.34	17.01	17.2	11.64	13.17	11.82	12.24	14.93	16.2	16.44	19.74	17.19	17.14
	LFI	7.65	4.96	6.35	5.41	6.51	6.66	5.62	5.38	5.7	6.85	5.16	5.6	5.31	6.47	5.99	6.2	6.07
	DFI	0.24	0.17	0.22	0.28	0.3	0.2 3	0.21	0.28	0.28	0.33	0.24	0.18	0.25	0.25	0.23	0.25	0.3
	SCoT- pb%	79.1667	81.25	87.5	78.125	71.875	59.375	75	78.125	75	93.75	89.5833	71.875	77.0833	65.625	64.5833	67.7083	65.625
		Figure 5. Two-way hierarchical cluster analysis (HCA) of seventeen soybean genotypes associated with the soybean seedling morphology, field performance and genetic variability.
